# Supplementary material
Source: publisher figshare collection journal article supplement (https://asha.figshare.com/articles/dataset/_/19617564)
Supplement: Supplementary file 1 [file 1]

## Supplemental Material S2. Full model outputs.

### *Full model output for the effect of phonation, gender, and anchor term on listener ratings.*

**Table S2.1.** Contrast coding for the effect of anchor term, gender, and phonation condition.

| Variable                            | [,1] | [,2] | [,3] | [,4] |
|-------------------------------------|------|------|------|------|
| <i>Condition</i>                    |      |      |      |      |
| Phonated                            | 1    |      |      |      |
| Whispered                           | –1   |      |      |      |
| <i>Gender</i>                       |      |      |      |      |
| Cismen                              | 1    | 0    |      |      |
| Ciswomen                            | 0    | 1    |      |      |
| Transfeminine                       | –1   | –1   |      |      |
| <i>Anchor Term</i>                  |      |      |      |      |
| Very Female/Very Male               | –1   | –1   | –1   | –1   |
| Feminine/Masculine                  | 1    | 0    | 0    | 0    |
| Feminine Female/Masculine Male      | 0    | 1    | 0    | 0    |
| Very Feminine/Not at all Feminine   | 0    | 0    | 1    | 0    |
| Not at all Masculine/Very Masculine | 0    | 0    | 0    | 1    |
| <i>Vowel</i>                        |      |      |      |      |
| Had                                 | 1    | 0    | 0    |      |
| Hid                                 | 0    | 1    | 0    |      |
| Hod                                 | 0    | 0    | 1    |      |
| Who’d                               | –1   | –1   | –1   |      |
| <i>Listener Gender</i>              |      |      |      |      |
| Female                              | 1    | 0    | 0    |      |
| Male                                | 0    | 1    | 0    |      |
| Gender Diverse                      | 0    | 0    | 1    |      |
| Prefer not to answer                | –1   | –1   | –1   |      |

**Table S2.2.** ANOVA table for linear mixed-effects model (with Satterthwaite approximation for degrees of freedom) for the effect of anchor term, gender, and phonation condition.

| Variable            | Sum Sq | Mean Sq | NumDF | DenDF   | F-value | p-value          | $\eta^2_p$  |
|---------------------|--------|---------|-------|---------|---------|------------------|-------------|
| Condition           | 3803   | 3803    | 1     | 28      | 13.15   | <b>.001</b>      | <b>0.32</b> |
| Gender              | 66007  | 33003   | 2     | 23      | 114.12  | <b>&lt; .001</b> | <b>0.91</b> |
| Anchor term         | 3984   | 996     | 4     | 104.3   | 3.44    | <b>.011</b>      | <b>0.12</b> |
| Vowel               | 40895  | 13632   | 3     | 18948.8 | 47.14   | <b>&lt; .001</b> | <b>0.01</b> |
| Condition: Gender   | 9135   | 4567    | 2     | 23      | 15.79   | <b>&lt; .001</b> | <b>0.58</b> |
| Gender: Anchor term | 98890  | 12361   | 8     | 18945.1 | 42.74   | <b>&lt; .001</b> | <b>0.02</b> |

*Abbreviations:* Sq = squared; NumDF = numerator, degrees of freedom; DenDF = denominator, degrees of freedom.

**Table S2.3.** Summary output of linear mixed-effects model for the effects of anchor term, gender, and phonation condition.

| Fixed Effects        | Estimate                       | SE       | DF    | t-value | p-value |
|----------------------|--------------------------------|----------|-------|---------|---------|
| (Intercept)          | 55.700                         | 1.728    | 25    | 32.232  | < .001  |
| Condition1           | 3.363                          | 0.927    | 28    | 3.626   | .001    |
| Gender1              | 21.381                         | 2.357    | 23    | 9.070   | < .001  |
| Gender2              | -36.648                        | 2.438    | 23    | -15.031 | < .001  |
| Anchor term1         | -1.234                         | 0.722    | 104   | -1.710  | .090    |
| Anchor term2         | 0.105                          | 0.709    | 104   | 0.148   | .883    |
| Anchor term3         | 1.802                          | 0.709    | 104   | 2.540   | .013    |
| Anchor term4         | -1.752                         | 0.735    | 104   | -2.384  | .019    |
| Vowel1               | -1.429                         | 0.214    | 18957 | -6.669  | < .001  |
| Vowel2               | -1.346                         | 0.212    | 18946 | -6.343  | < .001  |
| Vowel3               | 2.030                          | 0.212    | 18946 | 9.564   | < .001  |
| Condition1:Gender1   | 4.008                          | 1.234    | 23    | 3.249   | .004    |
| Condition1:Gender2   | -7.152                         | 1.276    | 23    | -5.605  | < .001  |
| Gender1:Anchor term1 | -2.511                         | 0.343    | 18945 | -7.310  | < .001  |
| Gender2:Anchor term1 | 4.892                          | 0.355    | 18945 | 13.770  | < .001  |
| Gender1:Anchor term2 | 2.976                          | 0.338    | 18945 | 8.813   | < .001  |
| Gender2:Anchor term2 | -4.792                         | 0.349    | 18945 | -13.722 | < .001  |
| Gender1:Anchor term3 | 0.574                          | 0.337    | 18945 | 1.701   | .089    |
| Gender2:Anchor term3 | -1.681                         | 0.349    | 18945 | -4.815  | < .001  |
| Gender1:Anchor term4 | 0.217                          | 0.350    | 18945 | 0.620   | .536    |
| Gender2:Anchor term4 | 0.312                          | 0.362    | 18945 | 0.862   | .389    |
| Random Effects       | Type                           | Variance | SD    |         |         |
|                      | Listener (Intercept)           | 15.02    | 3.876 |         |         |
|                      | Condition1 (by-listener slope) | 8.55     | 2.924 |         |         |
|                      | Speaker (Intercept)            | 64.78    | 8.049 |         |         |
|                      | Condition1 (by-talker slope)   | 17.49    | 4.182 |         |         |

Abbreviations: SE = standard error; DF = degrees of freedom; SD = standard deviation.

**Table S2.4.** Summary output of the post-hoc pairwise comparisons for the main effects of vowel.

| Contrast    | Estimate | SE    | DF  | z-ratio | p-value |
|-------------|----------|-------|-----|---------|---------|
| had - hid   | -0.083   | 0.349 | Inf | -0.237  | .995    |
| had - hod   | -3.459   | 0.349 | Inf | -9.921  | < .001  |
| had - who'd | -2.174   | 0.349 | Inf | -6.236  | < .001  |
| hid - hod   | -3.377   | 0.346 | Inf | -9.753  | < .001  |
| hid - who'd | -2.092   | 0.346 | Inf | -6.041  | < .001  |
| hod - who'd | 1.285    | 0.346 | Inf | 3.711   | .001    |

Abbreviations: SE = standard error; DF = degrees of freedom.

**Table S2.5.** Summary output of the post-hoc pairwise comparisons for the two-way interaction effects of condition by gender and gender by anchor term.

| Contrast: Phonated - Whispered | Estimate | SE    | DF  | z-ratio | p-value |
|--------------------------------|----------|-------|-----|---------|---------|
| Cis men                        | 14.740   | 3.040 | Inf | 4.849   | < .001  |
| Cis women                      | -7.580   | 3.240 | Inf | -2.336  | .020    |
| Trans women                    | 13.020   | 3.040 | Inf | 4.280   | < .001  |

Abbreviations: SE = standard error; DF = degrees of freedom.

**Table S2.6.** Summary output of the post-hoc pairwise comparisons for the two-way interaction effects of gender by anchor term.

| Contrast: Cis men                                                       | Estimate | SE   | DF  | z-ratio | p-value          |
|-------------------------------------------------------------------------|----------|------|-----|---------|------------------|
| Very Female/Very Male – Feminine/Masculine                              | –3.57    | 1.27 | Inf | –2.804  | <b>.040</b>      |
| Very Female/Very Male – Feminine Female/Masculine Male                  | 3.26     | 1.26 | Inf | 2.588   | .073             |
| Very Female/Very Male – Very Feminine/Not at all Feminine               | 2.55     | 1.26 | Inf | 2.028   | .252             |
| Very Female/Very Male – Not at all Masculine/Very Masculine             | –1.36    | 1.29 | Inf | –1.055  | .829             |
| Feminine/Masculine – Feminine Female/Masculine Male                     | –6.83    | 1.24 | Inf | –5.492  | <b>&lt; .001</b> |
| Feminine/Masculine – Very Feminine/Not at all Feminine                  | –6.12    | 1.24 | Inf | –4.925  | <b>&lt; .001</b> |
| Feminine/Masculine – Not at all Masculine/Very Masculine                | –2.21    | 1.27 | Inf | –1.736  | .412             |
| Feminine Female/Masculine Male – Very Feminine/ Not at all Feminine     | 0.71     | 1.23 | Inf | 0.574   | .979             |
| Feminine Female/Masculine Male – Not at all Masculine – Very Masculine  | 4.62     | 1.26 | Inf | 3.668   | <b>.002</b>      |
| Very Feminine/Not at all Feminine – Not at all Masculine/Very Masculine | 3.91     | 1.26 | Inf | 3.108   | <b>.016</b>      |
| Contrast: Cis women                                                     | Estimate | SE   | DF  | z-ratio | p-value          |
| Very Female/Very Male – Feminine/Masculine                              | 1.31     | 1.30 | Inf | 1.010   | .851             |
| Very Female/Very Male – Feminine Female/Masculine Male                  | –7.04    | 1.28 | Inf | –5.483  | <b>&lt; .001</b> |
| Very Female/Very Male – Very Feminine/Not at all Feminine               | –2.23    | 1.28 | Inf | –1.736  | .412             |
| Very Female/Very Male – Not at all Masculine/Very Masculine             | –3.79    | 1.31 | Inf | –2.885  | <b>.032</b>      |
| Feminine/Masculine – Feminine Female/Masculine Male                     | 8.35     | 1.27 | Inf | 6.588   | <b>&lt; .001</b> |
| Feminine/Masculine – Very Feminine/Not at all Feminine                  | 3.54     | 1.27 | Inf | 2.793   | <b>.042</b>      |
| Feminine/Masculine – Not at all Masculine/Very Masculine                | 5.10     | 1.30 | Inf | 3.931   | <b>.001</b>      |
| Feminine Female/Masculine Male – Very Feminine/ Not at all Feminine     | –4.81    | 1.25 | Inf | –3.841  | <b>.001</b>      |
| Feminine Female/Masculine Male – Not at all Masculine – Very Masculine  | –3.25    | 1.28 | Inf | –2.531  | .084             |
| Very Feminine/Not at all Feminine – Not at all Masculine/Very Masculine | 1.56     | 1.28 | Inf | 1.217   | .741             |
| Contrast: Trans women                                                   | Estimate | SE   | DF  | z-ratio | p-value          |
| Very Female/Very Male – Feminine/Masculine                              | –4.68    | 1.28 | Inf | –3.668  | <b>.002</b>      |
| Very Female/Very Male – Feminine Female/ Masculine Male                 | 0.86     | 1.26 | Inf | 0.677   | .961             |
| Very Female/Very Male – Very Feminine/Not at all Feminine               | 1.84     | 1.26 | Inf | 1.459   | .589             |
| Very Female/Very Male – Not at all Masculine/Very Masculine             | –3.35    | 1.29 | Inf | –2.591  | .072             |
| Feminine/Masculine – Feminine Female/Masculine Male                     | –5.54    | 1.25 | Inf | –4.442  | <b>&lt; .001</b> |
| Feminine/Masculine – Very Feminine/Not at all Feminine                  | –6.52    | 1.25 | Inf | –5.235  | <b>&lt; .001</b> |
| Feminine/Masculine – Not at all Masculine/Very Masculine                | –1.34    | 1.28 | Inf | –1.046  | .834             |
| Feminine Female/Masculine Male – Very Feminine/ Not at all Feminine     | –0.99    | 1.23 | Inf | –0.801  | .930             |
| Feminine Female/Masculine Male – Not at all Masculine – Very Masculine  | 4.20     | 1.26 | Inf | 3.329   | <b>.008</b>      |
| Very Feminine/Not at all Feminine – Not at all Masculine/Very Masculine | 5.19     | 1.26 | Inf | 4.111   | <b>&lt; .001</b> |

Abbreviations: SE = standard error; DF = degrees of freedom.

**All full model outputs for the effect of token and speaker cues on listener ratings within condition, gender and anchor term.**

**Table S2.7.** ANOVA table for linear mixed-effects model (with Satterthwaite approximation for degrees of freedom) for speaker and token effects on ratings of cis men in phonated speech.

| <b>Very Female/Very Male</b>               |        |         |       |       |         |                  |             |
|--------------------------------------------|--------|---------|-------|-------|---------|------------------|-------------|
| Variable                                   | Sum Sq | Mean Sq | NumDF | DenDF | F-value | p-value          | $\eta^2_p$  |
| Mean $f_0$                                 | 1422   | 1422    | 1     | 20    | 13.102  | <b>.002</b>      | <b>0.40</b> |
| F2                                         | 458    | 458     | 1     | 269   | 4.223   | <b>.041</b>      | <b>0.02</b> |
| Duration                                   | 285    | 285     | 1     | 67    | 2.630   | .110             | 0.04        |
| CPPs                                       | 113    | 113     | 1     | 108   | 1.042   | .310             | 0.00        |
| Age                                        | 92     | 92      | 1     | 8     | 0.845   | .384             | 0.09        |
| Height                                     | 1317   | 1317    | 1     | 7     | 12.132  | <b>.011</b>      | <b>0.64</b> |
| <b>Feminine/Masculine</b>                  |        |         |       |       |         |                  |             |
| Variable                                   | Sum Sq | Mean Sq | NumDF | DenDF | F-value | p-value          | $\eta^2_p$  |
| Mean $f_0$                                 | 1029   | 1029    | 1     | 75    | 9.699   | <b>.003</b>      | <b>0.11</b> |
| F2                                         | 235    | 235     | 1     | 465   | 2.218   | .137             | 0.00        |
| Duration                                   | 260    | 260     | 1     | 243   | 2.448   | .119             | 0.00        |
| CPPs                                       | 779    | 779     | 1     | 373   | 7.344   | <b>.007</b>      | <b>0.02</b> |
| Age                                        | 3      | 3       | 1     | 8     | 0.029   | .870             | 0.00        |
| Height                                     | 211    | 211     | 1     | 7     | 1.988   | .200             | 0.22        |
| <b>Feminine Female/Masculine Male</b>      |        |         |       |       |         |                  |             |
| Variable                                   | Sum Sq | Mean Sq | NumDF | DenDF | F-value | p-value          | $\eta^2_p$  |
| Mean $f_0$                                 | 1375   | 1375    | 1     | 142   | 14.178  | <b>&lt; .001</b> | <b>0.09</b> |
| F2                                         | 1087   | 1087    | 1     | 570   | 11.211  | <b>.001</b>      | <b>0.02</b> |
| Duration                                   | 440    | 440     | 1     | 378   | 4.532   | <b>.034</b>      | <b>0.01</b> |
| CPPs                                       | 496    | 496     | 1     | 514   | 5.114   | <b>.024</b>      | <b>0.00</b> |
| Age                                        | 7      | 7       | 1     | 8     | 0.067   | .802             | 0.00        |
| Height                                     | 692    | 692     | 1     | 8     | 7.132   | <b>.030</b>      | <b>0.48</b> |
| <b>Very Feminine/Not at all Feminine</b>   |        |         |       |       |         |                  |             |
| Variable                                   | Sum Sq | Mean Sq | NumDF | DenDF | F-value | p-value          | $\eta^2_p$  |
| Mean $f_0$                                 | 524    | 524     | 1     | 244   | 5.026   | <b>.026</b>      | <b>0.05</b> |
| F2                                         | 1291   | 1291    | 1     | 939   | 12.374  | <b>&lt; .001</b> | <b>0.00</b> |
| Duration                                   | 429    | 429     | 1     | 634   | 4.113   | <b>.043</b>      | <b>0.00</b> |
| CPPs                                       | 286    | 286     | 1     | 862   | 2.740   | .098             | 0.00        |
| Age                                        | 1      | 1       | 1     | 7     | 0.006   | .941             | 0.00        |
| Height                                     | 217    | 217     | 1     | 7     | 2.078   | .192             | 0.26        |
| <b>Not at all Masculine/Very Masculine</b> |        |         |       |       |         |                  |             |
| Variable                                   | Sum Sq | Mean Sq | NumDF | DenDF | F-value | p-value          | $\eta^2_p$  |
| Mean $f_0$                                 | 148    | 148     | 1     | 153   | 1.053   | .306             | 0.00        |
| F2                                         | 183    | 183     | 1     | 540   | 1.303   | .254             | 0.00        |
| Duration                                   | 0      | 0       | 1     | 382   | 0.000   | .993             | 0.00        |
| CPPs                                       | 807    | 807     | 1     | 499   | 5.752   | <b>.017</b>      | <b>0.01</b> |
| Age                                        | 5      | 5       | 1     | 7     | 0.032   | .863             | 0.00        |
| Height                                     | 105    | 105     | 1     | 7     | 0.751   | .417             | 0.10        |

Abbreviations: Sq = squared; NumDF = numerator, degrees of freedom; DenDF = denominator, degrees of freedom; Duration =  $h$  + vowel duration.

**Table S2.8.** Summary output of linear mixed-effects model for speaker and token effects on ratings of cis men in phonated speech.

| Very Female/Very Male               |                      |          |         |         |         |
|-------------------------------------|----------------------|----------|---------|---------|---------|
| Fixed Effects                       | Estimate             | SE       | DF      | t-value | p-value |
| Intercept                           | 85.059               | 2.105    | 22.892  | 40.418  | < .001  |
| Mean $f_0$                          | -2.437               | 0.673    | 19.703  | -3.620  | .002    |
| F2                                  | -1.132               | 0.551    | 269.044 | -2.055  | .041    |
| Duration                            | -1.079               | 0.665    | 66.903  | -1.622  | .110    |
| CPPs                                | -0.612               | 0.600    | 107.995 | -1.021  | .310    |
| Age                                 | 0.873                | 0.950    | 8.197   | 0.919   | .384    |
| Height                              | 3.100                | 0.890    | 6.684   | 3.483   | .011    |
| Random Effects                      | Type                 | Variance | SD      |         |         |
|                                     | Listener (Intercept) | 76.258   | 8.733   |         |         |
|                                     | Speaker (Intercept)  | 3.571    | 1.890   |         |         |
| Feminine/Masculine                  |                      |          |         |         |         |
| Fixed Effects                       | Estimate             | SE       | DF      | t-value | p-value |
| Intercept                           | 81.390               | 2.206    | 23.055  | 36.903  | < .001  |
| Mean $f_0$                          | -2.658               | 0.853    | 75.053  | -3.114  | .003    |
| F2                                  | -0.845               | 0.567    | 465.284 | -1.489  | .137    |
| Duration                            | -1.152               | 0.737    | 242.615 | -1.565  | .119    |
| CPPs                                | -1.733               | 0.640    | 373.309 | -2.710  | .007    |
| Age                                 | 0.276                | 1.636    | 7.821   | 0.169   | .870    |
| Height                              | 2.253                | 1.598    | 7.178   | 1.410   | .200    |
| Random Effects                      | Type                 | Variance | SD      |         |         |
|                                     | Listener (Intercept) | 59.930   | 7.741   |         |         |
|                                     | Speaker (Intercept)  | 14.820   | 3.850   |         |         |
| Feminine Female/Masculine Male      |                      |          |         |         |         |
| Fixed Effects                       | Estimate             | SE       | DF      | t-value | p-value |
| Intercept                           | 86.557               | 1.825    | 10.651  | 47.423  | < .001  |
| Mean $f_0$                          | -3.182               | 0.845    | 142.123 | -3.765  | < .001  |
| F2                                  | -1.802               | 0.538    | 570.179 | -3.348  | .001    |
| Duration                            | -1.507               | 0.708    | 378.397 | -2.129  | .034    |
| CPPs                                | -1.378               | 0.609    | 513.999 | -2.261  | .024    |
| Age                                 | 0.492                | 1.902    | 8.071   | 0.259   | .802    |
| Height                              | 5.000                | 1.872    | 7.613   | 2.671   | .030    |
| Random Effects                      | Type                 | Variance | SD      |         |         |
|                                     | Listener (Intercept) | 12.400   | 3.522   |         |         |
|                                     | Speaker (Intercept)  | 21.04    | 4.587   |         |         |
| Very Feminine/Not at all Feminine   |                      |          |         |         |         |
| Fixed Effects                       | Estimate             | SE       | DF      | t-value | p-value |
| Intercept                           | 86.987               | 2.025    | 16.304  | 42.968  | < .001  |
| Mean $f_0$                          | -1.571               | 0.701    | 244.099 | -2.242  | .026    |
| F2                                  | -1.529               | 0.435    | 939.213 | -3.518  | < .001  |
| Duration                            | -1.168               | 0.576    | 634.315 | -2.028  | .043    |
| CPPs                                | -0.816               | 0.493    | 861.731 | -1.655  | .098    |
| Age                                 | 0.141                | 1.837    | 7.491   | 0.077   | .941    |
| Height                              | 2.619                | 1.817    | 7.188   | 1.441   | .192    |
| Random Effects                      | Type                 | Variance | SD      |         |         |
|                                     | Listener (Intercept) | 55.000   | 7.416   |         |         |
|                                     | Speaker (Intercept)  | 20.19    | 4.493   |         |         |
| Not at all Masculine/Very Masculine |                      |          |         |         |         |
| Fixed Effects                       | Estimate             | SE       | DF      | t-value | p-value |
| Intercept                           | 81.823               | 2.860    | 14.269  | 28.610  | < .001  |
| Mean $f_0$                          | -1.112               | 1.084    | 153.336 | -1.026  | .306    |
| F2                                  | -0.779               | 0.682    | 540.071 | -1.142  | .254    |

|                |                      |          |         |        |             |
|----------------|----------------------|----------|---------|--------|-------------|
| Duration       | 0.008                | 0.900    | 381.676 | 0.009  | .993        |
| CPPs           | -1.854               | 0.773    | 498.781 | -2.398 | <b>.017</b> |
| Age            | -0.465               | 2.592    | 6.918   | -0.179 | .863        |
| Height         | 2.216                | 2.558    | 6.576   | 0.867  | .417        |
| Random Effects | Type                 | Variance | SD      |        |             |
|                | Listener (Intercept) | 60.240   | 7.762   |        |             |
|                | Speaker (Intercept)  | 39.580   | 6.292   |        |             |

Abbreviations: *SE* = standard error; *DF* = degrees of freedom; Duration = *h* + vowel duration.

**Table S2.9.** ANOVA table for linear mixed-effects model (with Satterthwaite approximation for degrees of freedom) for speaker and token effects on ratings of cis men in whispered speech.

| <b>Very Female/Very Male</b>               |        |         |       |       |                 |                 |             |
|--------------------------------------------|--------|---------|-------|-------|-----------------|-----------------|-------------|
| Variable                                   | Sum Sq | Mean Sq | NumDF | DenDF | <i>F</i> -value | <i>p</i> -value | $\eta^2_p$  |
| F2                                         | 19     | 19      | 1     | 602   | 0.050           | .823            | 0.00        |
| Duration                                   | 1236   | 1236    | 1     | 259   | 3.337           | .069            | 0.01        |
| Age                                        | 655    | 655     | 1     | 7     | 1.769           | .226            | 0.20        |
| Height                                     | 7320   | 7320    | 1     | 8     | 19.760          | <b>.002</b>     | <b>0.72</b> |
| <b>Feminine/Masculine</b>                  |        |         |       |       |                 |                 |             |
| Variable                                   | Sum Sq | Mean Sq | NumDF | DenDF | <i>F</i> -value | <i>p</i> -value | $\eta^2_p$  |
| F2                                         | 6      | 6       | 1     | 649   | 0.020           | .887            | 0.00        |
| Duration                                   | 1886   | 1886    | 1     | 486   | 6.630           | <b>.010</b>     | <b>0.01</b> |
| Age                                        | 0      | 0       | 1     | 7     | 0.001           | .977            | 0.00        |
| Height                                     | 3824   | 3824    | 1     | 8     | 13.442          | <b>.007</b>     | <b>0.63</b> |
| <b>Feminine Female/Masculine Male</b>      |        |         |       |       |                 |                 |             |
| Variable                                   | Sum Sq | Mean Sq | NumDF | DenDF | <i>F</i> -value | <i>p</i> -value | $\eta^2_p$  |
| F2                                         | 493    | 493     | 1     | 681   | 1.412           | .235            | 0.00        |
| Duration                                   | 1625   | 1625    | 1     | 613   | 4.649           | <b>.031</b>     | <b>0.00</b> |
| Age                                        | 145    | 145     | 1     | 8     | 0.415           | .538            | 0.05        |
| Height                                     | 4476   | 4476    | 1     | 8     | 12.808          | <b>.007</b>     | <b>0.62</b> |
| <b>Very Feminine/Not at all Feminine</b>   |        |         |       |       |                 |                 |             |
| Variable                                   | Sum Sq | Mean Sq | NumDF | DenDF | <i>F</i> -value | <i>p</i> -value | $\eta^2_p$  |
| F2                                         | 851    | 851     | 1     | 1146  | 2.317           | .128            | 0.00        |
| Duration                                   | 3828   | 3828    | 1     | 970   | 10.417          | <b>.001</b>     | <b>0.02</b> |
| Age                                        | 30     | 30      | 1     | 8     | 0.081           | .783            | 0.04        |
| Height                                     | 5262   | 5262    | 1     | 8     | 14.322          | <b>.005</b>     | <b>0.74</b> |
| <b>Not at all Masculine/Very Masculine</b> |        |         |       |       |                 |                 |             |
| Variable                                   | Sum Sq | Mean Sq | NumDF | DenDF | <i>F</i> -value | <i>p</i> -value | $\eta^2_p$  |
| F2                                         | 59     | 59      | 1     | 621   | 0.191           | .663            | 0.00        |
| Duration                                   | 1666   | 1666    | 1     | 568   | 5.377           | <b>.021</b>     | <b>0.00</b> |
| Age                                        | 30     | 30      | 1     | 8     | 0.097           | .763            | 0.01        |
| Height                                     | 3926   | 3926    | 1     | 8     | 12.668          | <b>.007</b>     | <b>0.61</b> |

Abbreviations: Sq = squared; NumDF = numerator, degrees of freedom; DenDF = denominator, degrees of freedom; Duration = *h* + vowel duration.

**Table S2.10.** Summary output of linear mixed-effects model for speaker and token effects on ratings of cis men in whispered speech.

| <b>Very Female/Very Male</b> |          |           |           |                 |                 |
|------------------------------|----------|-----------|-----------|-----------------|-----------------|
| Fixed Effects                | Estimate | <i>SE</i> | <i>DF</i> | <i>t</i> -value | <i>p</i> -value |
| Intercept                    | 68.594   | 3.459     | 23.698    | 19.830          | < <b>.001</b>   |
| F2                           | -0.208   | 0.929     | 602.242   | -0.223          | .823            |
| Duration                     | 2.541    | 1.391     | 259.236   | 1.827           | .069            |
| Age                          | 2.794    | 2.101     | 6.901     | 1.330           | .226            |
| Height                       | 68.594   | 3.459     | 23.698    | 19.830          | < <b>.001</b>   |

| Random Effects                      | Type                 | Variance | SD       |         |         |
|-------------------------------------|----------------------|----------|----------|---------|---------|
|                                     | Listener (Intercept) | 170.840  | 13.070   |         |         |
|                                     | Speaker (Intercept)  | 22.760   | 4.771    |         |         |
| Feminine/Masculine                  |                      |          |          |         |         |
| Fixed Effects                       | Estimate             | SE       | DF       | t-value | p-value |
| Intercept                           | 63.865               | 3.079    | 18.875   | 20.740  | < .001  |
| F2                                  | −0.114               | 0.802    | 649.285  | −0.143  | .887    |
| Duration                            | 3.174                | 1.233    | 486.388  | 2.575   | .010    |
| Age                                 | 0.077                | 2.520    | 7.236    | 0.030   | .977    |
| Height                              | 9.400                | 2.564    | 7.734    | 3.666   | .007    |
| Random Effects                      | Type                 | Variance | SD       |         |         |
|                                     | Listener (Intercept) | 94.570   | 9.725    |         |         |
|                                     | Speaker (Intercept)  | 36.440   | 6.036    |         |         |
| Feminine Female/Masculine Male      |                      |          |          |         |         |
| Fixed Effects                       | Estimate             | SE       | DF       | t-value | p-value |
| Intercept                           | 74.362               | 3.282    | 9.976    | 22.661  | < .001  |
| F2                                  | −1.034               | 0.870    | 681.014  | −1.188  | .235    |
| Duration                            | 2.913                | 1.351    | 613.113  | 2.156   | .031    |
| Age                                 | 2.209                | 3.430    | 7.651    | 0.644   | .538    |
| Height                              | 12.433               | 3.474    | 7.996    | 3.579   | .007    |
| Random Effects                      | Type                 | Variance | SD       |         |         |
|                                     | Listener (Intercept) | 33.010   | 5.745    |         |         |
|                                     | Speaker (Intercept)  | 70.160   | 8.376    |         |         |
| Very Feminine/Not at all Feminine   |                      |          |          |         |         |
| Fixed Effects                       | Estimate             | SE       | DF       | t-value | p-value |
| Intercept                           | 69.871               | 3.001    | 13.710   | 23.284  | < .001  |
| F2                                  | −1.047               | 0.688    | 1146.383 | −1.522  | .128    |
| Duration                            | 3.457                | 1.071    | 969.677  | 3.228   | .001    |
| Age                                 | 0.820                | 2.881    | 7.639    | 0.285   | .783    |
| Height                              | 11.016               | 2.911    | 7.951    | 3.784   | .005    |
| Random Effects                      | Type                 | Variance | SD       |         |         |
|                                     | Listener (Intercept) | 91.220   | 9.551    |         |         |
|                                     | Speaker (Intercept)  | 49.830   | 7.059    |         |         |
| Not at all Masculine/Very Masculine |                      |          |          |         |         |
| Fixed Effects                       | Estimate             | SE       | DF       | t-value | p-value |
| Intercept                           | 69.633               | 3.139    | 8.757    | 22.186  | < .001  |
| F2                                  | −0.375               | 0.859    | 620.784  | −0.437  | .663    |
| Duration                            | 3.096                | 1.335    | 567.766  | 2.319   | .021    |
| Age                                 | 1.061                | 3.398    | 7.631    | 0.312   | .763    |
| Height                              | 12.237               | 3.438    | 7.978    | 3.559   | .007    |
| Random Effects                      | Type                 | Variance | SD       |         |         |
|                                     | Listener (Intercept) | 15.290   | 3.911    |         |         |
|                                     | Speaker (Intercept)  | 68.820   | 8.296    |         |         |

Abbreviations: SE = standard error; DF = degrees of freedom; Duration = *h* + vowel duration.

**Table S2.11.** ANOVA table for linear mixed-effects model (with Satterthwaite approximation for degrees of freedom) for speaker and token effects on ratings of cis women in phonated speech.

| <b>Very Female/Very Male</b>               |        |         |       |       |         |                  |             |
|--------------------------------------------|--------|---------|-------|-------|---------|------------------|-------------|
| Variable                                   | Sum Sq | Mean Sq | NumDF | DenDF | F-value | p-value          | $\eta^2_p$  |
| Mean $f_0$                                 | 185    | 185     | 1     | 538   | 0.954   | .329             | 0.00        |
| F2                                         | 36     | 36      | 1     | 538   | 0.186   | .667             | 0.00        |
| Duration                                   | 238    | 238     | 1     | 538   | 1.226   | .269             | 0.00        |
| CPPs                                       | 3403   | 3403    | 1     | 538   | 17.557  | <b>&lt; .001</b> | <b>0.03</b> |
| Age                                        | 3427   | 3427    | 1     | 538   | 17.682  | <b>&lt; .001</b> | <b>0.03</b> |
| Height                                     | 561    | 561     | 1     | 538   | 2.896   | .089             | 0.00        |
| <b>Feminine/Masculine</b>                  |        |         |       |       |         |                  |             |
| Variable                                   | Sum Sq | Mean Sq | NumDF | DenDF | F-value | p-value          | $\eta^2_p$  |
| Mean $f_0$                                 | 639    | 639     | 1     | 566   | 5.311   | <b>.022</b>      | <b>0.00</b> |
| F2                                         | 337    | 337     | 1     | 566   | 2.796   | .095             | 0.00        |
| Duration                                   | 345    | 345     | 1     | 566   | 2.866   | .091             | 0.00        |
| CPPs                                       | 1099   | 1099    | 1     | 566   | 9.128   | <b>.003</b>      | <b>0.02</b> |
| Age                                        | 2675   | 2675    | 1     | 566   | 22.220  | <b>&lt; .001</b> | <b>0.04</b> |
| Height                                     | 579    | 579     | 1     | 566   | 4.808   | <b>.029</b>      | <b>0.00</b> |
| <b>Feminine Female/Masculine Male</b>      |        |         |       |       |         |                  |             |
| Variable                                   | Sum Sq | Mean Sq | NumDF | DenDF | F-value | p-value          | $\eta^2_p$  |
| Mean $f_0$                                 | 1010   | 1010    | 1     | 593   | 6.907   | <b>.009</b>      | <b>0.01</b> |
| F2                                         | 1599   | 1599    | 1     | 593   | 10.934  | <b>.001</b>      | <b>0.02</b> |
| Duration                                   | 557    | 557     | 1     | 593   | 3.810   | .051             | 0.00        |
| CPPs                                       | 3409   | 3409    | 1     | 593   | 23.306  | <b>&lt; .001</b> | <b>0.04</b> |
| Age                                        | 5852   | 5852    | 1     | 593   | 40.012  | <b>&lt; .001</b> | <b>0.06</b> |
| Height                                     | 1114   | 1114    | 1     | 593   | 7.620   | <b>.006</b>      | <b>0.01</b> |
| <b>Very Feminine/Not at all Feminine</b>   |        |         |       |       |         |                  |             |
| Variable                                   | Sum Sq | Mean Sq | NumDF | DenDF | F-value | p-value          | $\eta^2_p$  |
| Mean $f_0$                                 | 1200   | 1200    | 1     | 594   | 10.753  | <b>.001</b>      | <b>0.02</b> |
| F2                                         | 965    | 965     | 1     | 594   | 8.644   | <b>.003</b>      | <b>0.01</b> |
| Duration                                   | 501    | 501     | 1     | 594   | 4.488   | <b>.035</b>      | <b>0.00</b> |
| CPPs                                       | 927    | 927     | 1     | 594   | 8.307   | <b>.004</b>      | <b>0.01</b> |
| Age                                        | 1954   | 1954    | 1     | 594   | 17.500  | <b>&lt; .001</b> | <b>0.03</b> |
| Height                                     | 170    | 170     | 1     | 594   | 1.524   | .218             | 0.00        |
| <b>Not at all Masculine/Very Masculine</b> |        |         |       |       |         |                  |             |
| Variable                                   | Sum Sq | Mean Sq | NumDF | DenDF | F-value | p-value          | $\eta^2_p$  |
| Mean $f_0$                                 | 847    | 847     | 1     | 24    | 8.120   | <b>.009</b>      | <b>0.25</b> |
| F2                                         | 1797   | 1797    | 1     | 192   | 17.216  | <b>&lt; .001</b> | <b>0.08</b> |
| Duration                                   | 2192   | 2192    | 1     | 37    | 21.004  | <b>&lt; .001</b> | <b>0.36</b> |
| CPPs                                       | 130    | 130     | 1     | 33    | 1.247   | .272             | 0.04        |
| Age                                        | 189    | 189     | 1     | 6     | 1.808   | .227             | 0.23        |
| Height                                     | 175    | 175     | 1     | 4     | 1.679   | .262             | 0.29        |

*Abbreviations:* Sq = squared; NumDF = numerator, degrees of freedom; DenDF = denominator, degrees of freedom; Duration =  $h$  + vowel duration.



**Table S2.12.** Summary output of linear mixed-effects model for speaker and token effects on ratings of cis women in phonated speech.

| Very Female/Very Male               |                      |          |          |         |         |
|-------------------------------------|----------------------|----------|----------|---------|---------|
| Fixed Effects                       | Estimate             | SE       | DF       | t-value | p-value |
| Intercept                           | 16.372               | 2.351    | 19.973   | 6.965   | < .001  |
| Mean $f_0$                          | -0.724               | 0.742    | 537.973  | -0.977  | .329    |
| F2                                  | -0.309               | 0.718    | 537.978  | -0.431  | .667    |
| Duration                            | -0.914               | 0.825    | 537.977  | -1.107  | .269    |
| CPPs                                | -3.768               | 0.899    | 537.991  | -4.190  | < .001  |
| Age                                 | 4.087                | 0.972    | 537.974  | 4.205   | < .001  |
| Height                              | 1.201                | 0.706    | 537.987  | 1.702   | .089    |
| Random Effects                      | Type                 | Variance | SD       |         |         |
|                                     | Listener (Intercept) | 13.600   | 10.180   |         |         |
|                                     | Speaker (Intercept)  | 0.000    | 0.000    |         |         |
| Feminine/Masculine                  |                      |          |          |         |         |
| Fixed Effects                       | Estimate             | SE       | DF       | t-value | p-value |
| Intercept                           | 19.262               | 2.222    | 20.9996  | 8.669   | < .001  |
| Mean $f_0$                          | -1.312               | 0.569    | 566.0004 | -2.304  | .022    |
| F2                                  | -0.923               | 0.552    | 566.0129 | -1.672  | .095    |
| Duration                            | -1.074               | 0.634    | 566.0014 | -1.693  | .091    |
| CPPs                                | -2.090               | 0.692    | 566.0012 | -3.021  | .003    |
| Age                                 | 3.519                | 0.747    | 565.9996 | 4.714   | < .001  |
| Height                              | 1.187                | 0.541    | 566.0004 | 2.193   | .029    |
| Random Effects                      | Type                 | Variance | SD       |         |         |
|                                     | Listener (Intercept) | 99.373   | 9.969    |         |         |
|                                     | Speaker (Intercept)  | 0.000    | 0.000    |         |         |
| Feminine Female/Masculine Male      |                      |          |          |         |         |
| Fixed Effects                       | Estimate             | SE       | DF       | t-value | p-value |
| Intercept                           | 11.324               | 1.210    | 21.957   | 9.363   | < .001  |
| Mean $f_0$                          | -1.613               | 0.614    | 592.960  | -2.628  | .009    |
| F2                                  | -1.965               | 0.594    | 592.959  | -3.307  | .001    |
| Duration                            | -1.332               | 0.683    | 592.957  | -1.952  | .051    |
| CPPs                                | -3.596               | 0.745    | 592.958  | -4.828  | < .001  |
| Age                                 | 5.088                | 0.804    | 592.959  | 6.325   | < .001  |
| Height                              | 1.611                | 0.584    | 592.970  | 2.760   | .006    |
| Random Effects                      | Type                 | Variance | SD       |         |         |
|                                     | Listener (Intercept) | 26.950   | 5.191    |         |         |
|                                     | Speaker (Intercept)  | 0.000    | 0.000    |         |         |
| Very Feminine/Not at all Feminine   |                      |          |          |         |         |
| Fixed Effects                       | Estimate             | SE       | DF       | t-value | p-value |
| Intercept                           | 14.231               | 2.274    | 22.000   | 6.258   | < .001  |
| Mean $f_0$                          | -1.757               | 0.536    | 594.000  | -3.279  | .001    |
| F2                                  | -1.525               | 0.519    | 594.000  | -2.940  | .003    |
| Duration                            | -1.262               | 0.596    | 594.000  | -2.118  | .035    |
| CPPs                                | -1.874               | 0.650    | 594.000  | -2.882  | .004    |
| Age                                 | 2.937                | 0.702    | 594.000  | 4.183   | < .001  |
| Height                              | -0.629               | 0.509    | 594.000  | -1.234  | .218    |
| Random Effects                      | Type                 | Variance | SD       |         |         |
|                                     | Listener (Intercept) | 109.800  | 10.48    |         |         |
|                                     | Speaker (Intercept)  | 0.000    | 0.000    |         |         |
| Not at all Masculine/Very Masculine |                      |          |          |         |         |
| Fixed Effects                       | Estimate             | SE       | DF       | t-value | p-value |
| Intercept                           | 15.220               | 2.611    | 21.191   | 5.830   | < .001  |
| Mean $f_0$                          | -2.725               | 0.956    | 24.185   | -2.849  | .009    |
| F2                                  | -2.613               | 0.630    | 191.574  | -4.149  | < .001  |

|                |        |                      |          |        |        |
|----------------|--------|----------------------|----------|--------|--------|
| Duration       | −4.825 | 1.053                | 37.237   | −4.583 | < .001 |
| CPPs           | −1.232 | 1.103                | 32.895   | −1.117 | .272   |
| Age            | 2.008  | 1.493                | 6.071    | 1.345  | .227   |
| Height         | 1.705  | 1.316                | 4.190    | 1.296  | .262   |
| Random Effects |        | Type                 | Variance | SD     |        |
|                |        | Listener (Intercept) | 105.092  | 3.101  |        |
|                |        | Speaker (Intercept)  | 9.614    | 3.101  |        |

Abbreviations: *SE* = standard error; *DF* = degrees of freedom.

**Table S2.13.** ANOVA table for linear mixed-effects model (with Satterthwaite approximation for degrees of freedom) for speaker and token effects on ratings of cis women in whispered speech.

| <b>Very Female/Very Male</b>               |        |         |       |       |         |         |            |
|--------------------------------------------|--------|---------|-------|-------|---------|---------|------------|
| Variable                                   | Sum Sq | Mean Sq | NumDF | DenDF | F-value | p-value | $\eta^2_p$ |
| F2                                         | 920    | 920     | 1     | 537   | 2.573   | .109    | 0.00       |
| Duration                                   | 59     | 59      | 1     | 461   | 0.165   | .685    | 0.00       |
| Age                                        | 342    | 342     | 1     | 7     | 0.957   | .360    | 0.08       |
| Height                                     | 209    | 209     | 1     | 7     | 0.584   | .471    | 0.12       |
| <b>Feminine/Masculine</b>                  |        |         |       |       |         |         |            |
| Variable                                   | Sum Sq | Mean Sq | NumDF | DenDF | F-value | p-value | $\eta^2_p$ |
| F2                                         | 887    | 887     | 1     | 566   | 4.972   | .026    | 0.00       |
| Duration                                   | 239    | 239     | 1     | 528   | 1.337   | .248    | 0.00       |
| Age                                        | 97     | 97      | 1     | 7     | 0.541   | .486    | 0.07       |
| Height                                     | 187    | 187     | 1     | 7     | 1.046   | .343    | 0.14       |
| <b>Feminine Female/Masculine Male</b>      |        |         |       |       |         |         |            |
| Variable                                   | Sum Sq | Mean Sq | NumDF | DenDF | F-value | p-value | $\eta^2_p$ |
| F2                                         | 901    | 901     | 1     | 593   | 2.692   | .101    | 0.00       |
| Duration                                   | 2167   | 2167    | 1     | 535   | 6.479   | .011    | 0.01       |
| Age                                        | 157    | 157     | 1     | 7     | 0.470   | .514    | 0.06       |
| Height                                     | 147    | 147     | 1     | 7     | 0.439   | .529    | 0.06       |
| <b>Very Feminine/Not at all Feminine</b>   |        |         |       |       |         |         |            |
| Variable                                   | Sum Sq | Mean Sq | NumDF | DenDF | F-value | p-value | $\eta^2_p$ |
| F2                                         | 2165   | 2165    | 1     | 594   | 8.207   | .004    | 0.01       |
| Duration                                   | 168    | 168     | 1     | 563   | 0.636   | .426    | 0.00       |
| Age                                        | 52     | 52      | 1     | 7     | 0.198   | .670    | 0.03       |
| Height                                     | 266    | 266     | 1     | 7     | 1.009   | .351    | 0.13       |
| <b>Not at all Masculine/Very Masculine</b> |        |         |       |       |         |         |            |
| Variable                                   | Sum Sq | Mean Sq | NumDF | DenDF | F-value | p-value | $\eta^2_p$ |
| F2                                         | 1073   | 1073    | 1     | 540   | 6.742   | .010    | 0.01       |
| Duration                                   | 55     | 55      | 1     | 530   | 0.346   | .557    | 0.00       |
| Age                                        | 51     | 51      | 1     | 7     | 0.321   | .589    | 0.01       |
| Height                                     | 13     | 13      | 1     | 7     | 0.083   | .782    | 0.05       |

Abbreviations: Sq = squared; NumDF = numerator, degrees of freedom; DenDF = denominator, degrees of freedom; Duration = *h* + vowel duration.

**Table S2.14.** Summary output of linear mixed-effects model for speaker and token effects on ratings of cis women in whispered speech.

| <b>Very Female/Very Male</b> |          |       |         |         |         |
|------------------------------|----------|-------|---------|---------|---------|
| Fixed Effects                | Estimate | SE    | DF      | t-value | p-value |
| Intercept                    | 26.365   | 3.381 | 23.229  | 7.798   | < .001  |
| F2                           | −1.589   | 0.991 | 537.112 | −1.604  | .109    |
| Duration                     | −0.452   | 1.115 | 460.739 | −0.406  | .685    |
| Age                          | −1.813   | 1.854 | 7.155   | −0.978  | .360    |
| Height                       | −1.385   | 1.812 | 6.610   | −0.764  | .471    |

| Random Effects                      | Type                 | Variance | SD      |         |         |
|-------------------------------------|----------------------|----------|---------|---------|---------|
|                                     | Listener (Intercept) | 165.460  | 12.863  |         |         |
|                                     | Speaker (Intercept)  | 357.650  | 18.912  |         |         |
| Feminine/Masculine                  |                      |          |         |         |         |
| Fixed Effects                       | Estimate             | SE       | DF      | t-value | p-value |
| Intercept                           | 24.833               | 2.909    | 25.003  | 8.538   | < .001  |
| F2                                  | -1.528               | 0.685    | 566.285 | -2.230  | .026    |
| Duration                            | 0.897                | 0.775    | 528.441 | 1.156   | .248    |
| Age                                 | -1.121               | 1.524    | 6.896   | -0.735  | .486    |
| Height                              | -1.536               | 1.502    | 6.506   | -1.023  | .343    |
| Random Effects                      | Type                 | Variance | SD      |         |         |
|                                     | Listener (Intercept) | 132.070  | 11.492  |         |         |
|                                     | Speaker (Intercept)  | 13.070   | 3.615   |         |         |
| Feminine Female/Masculine Male      |                      |          |         |         |         |
| Fixed Effects                       | Estimate             | SE       | DF      | t-value | p-value |
| Intercept                           | 18.027               | 2.467    | 17.114  | 7.307   | < .001  |
| F2                                  | -1.504               | 0.916    | 593.185 | -1.641  | .101    |
| Duration                            | 2.634                | 1.035    | 534.709 | 2.545   | .011    |
| Age                                 | -1.294               | 1.888    | 7.387   | -0.685  | .514    |
| Height                              | -1.228               | 1.853    | 6.906   | -0.662  | .529    |
| Random Effects                      | Type                 | Variance | SD      |         |         |
|                                     | Listener (Intercept) | 61.210   | 7.824   |         |         |
|                                     | Speaker (Intercept)  | 19.330   | 4.396   |         |         |
| Very Feminine/Not at all Feminine   |                      |          |         |         |         |
| Fixed Effects                       | Estimate             | SE       | DF      | t-value | p-value |
| Intercept                           | 24.645               | 3.533    | 25.775  | 6.976   | < .001  |
| F2                                  | -2.330               | 0.813    | 594.424 | -2.865  | .004    |
| Duration                            | 0.735                | 0.922    | 563.380 | 0.797   | .426    |
| Age                                 | -0.857               | 1.925    | 6.843   | -0.445  | .670    |
| Height                              | -1.909               | 1.900    | 6.498   | -1.005  | .351    |
| Random Effects                      | Type                 | Variance | SD      |         |         |
|                                     | Listener (Intercept) | 197.960  | 14.070  |         |         |
|                                     | Speaker (Intercept)  | 21.370   | 4.623   |         |         |
| Not at all Masculine/Very Masculine |                      |          |         |         |         |
| Fixed Effects                       | Estimate             | SE       | DF      | t-value | p-value |
| Intercept                           | 20.368               | 2.772    | 22.322  | 7.348   | < .001  |
| F2                                  | -1.723               | 0.663    | 540.037 | -2.597  | .010    |
| Duration                            | 0.443                | 0.754    | 530.221 | 0.588   | .557    |
| Age                                 | -0.508               | 1.770    | 6.966   | -0.287  | .782    |
| Height                              | -0.992               | 1.751    | 6.685   | -0.567  | .589    |
| Random Effects                      | Type                 | Variance | SD      |         |         |
|                                     | Listener (Intercept) | 94.45    | 9.719   |         |         |
|                                     | Speaker (Intercept)  | 18.740   | 4.329   |         |         |

Abbreviations: SE = standard error; DF = degrees of freedom; Duration = *h* + vowel duration.

**Table S2.15.** ANOVA table for linear mixed-effects model (with Satterthwaite approximation for degrees of freedom) for speaker and token effects on ratings of transfeminine speakers in phonated speech.

| <b>Very Female/Very Male</b>               |        |         |       |       |         |                  |             |
|--------------------------------------------|--------|---------|-------|-------|---------|------------------|-------------|
| Variable                                   | Sum Sq | Mean Sq | NumDF | DenDF | F-value | p-value          | $\eta^2_p$  |
| Mean $f_0$                                 | 1333   | 1333    | 1     | 363   | 6.852   | <b>.009</b>      | <b>0.02</b> |
| F2                                         | 83     | 83      | 1     | 375   | 0.427   | .514             | 0.00        |
| Duration                                   | 293    | 293     | 1     | 107   | 1.509   | .222             | 0.01        |
| CPPs                                       | 0      | 0       | 1     | 15    | 0.000   | .999             | 0.00        |
| Age                                        | 878    | 878     | 1     | 10    | 4.514   | .059             | 0.31        |
| Height                                     | 3134   | 3134    | 1     | 11    | 16.115  | <b>.002</b>      | <b>0.60</b> |
| <b>Feminine/Masculine</b>                  |        |         |       |       |         |                  |             |
| Variable                                   | Sum Sq | Mean Sq | NumDF | DenDF | F-value | p-value          | $\eta^2_p$  |
| Mean $f_0$                                 | 2541   | 2541    | 1     | 415   | 18.106  | <b>&lt; .001</b> | <b>0.04</b> |
| F2                                         | 472    | 472     | 1     | 518   | 3.362   | .067             | 0.00        |
| Duration                                   | 765    | 765     | 1     | 227   | 5.452   | <b>.020</b>      | <b>0.02</b> |
| CPPs                                       | 8      | 8       | 1     | 21    | 0.060   | .809             | 0.00        |
| Age                                        | 92     | 92      | 1     | 9     | 0.658   | .438             | 0.07        |
| Height                                     | 1738   | 1738    | 1     | 9     | 12.381  | <b>.006</b>      | <b>0.58</b> |
| <b>Feminine Female/Masculine Male</b>      |        |         |       |       |         |                  |             |
| Variable                                   | Sum Sq | Mean Sq | NumDF | DenDF | F-value | p-value          | $\eta^2_p$  |
| Mean $f_0$                                 | 4277   | 4277    | 1     | 495   | 31.857  | <b>&lt; .001</b> | <b>0.06</b> |
| F2                                         | 629    | 629     | 1     | 634   | 4.683   | <b>.031</b>      | <b>0.00</b> |
| Duration                                   | 205    | 205     | 1     | 440   | 1.527   | .217             | 0.00        |
| CPPs                                       | 76     | 76      | 1     | 37    | 0.569   | .456             | 0.02        |
| Age                                        | 174    | 174     | 1     | 7     | 1.294   | .292             | 0.15        |
| Height                                     | 1832   | 1832    | 1     | 7     | 13.648  | <b>.008</b>      | <b>0.67</b> |
| <b>Very Feminine/Not at all Feminine</b>   |        |         |       |       |         |                  |             |
| Variable                                   | Sum Sq | Mean Sq | NumDF | DenDF | F-value | p-value          | $\eta^2_p$  |
| Mean $f_0$                                 | 2714   | 2714    | 1     | 749   | 16.106  | <b>&lt; .001</b> | <b>0.07</b> |
| F2                                         | 2873   | 2873    | 1     | 1057  | 17.047  | <b>&lt; .001</b> | <b>0.02</b> |
| Duration                                   | 1880   | 1880    | 1     | 738   | 11.157  | <b>.001</b>      | <b>0.04</b> |
| CPPs                                       | 158    | 158     | 1     | 54    | 0.939   | .337             | 0.14        |
| Age                                        | 222    | 222     | 1     | 7     | 1.320   | .291             | 0.42        |
| Height                                     | 1682   | 1682    | 1     | 6     | 9.981   | <b>.019</b>      | <b>0.73</b> |
| <b>Not at all Masculine/Very Masculine</b> |        |         |       |       |         |                  |             |
| Variable                                   | Sum Sq | Mean Sq | NumDF | DenDF | F-value | p-value          | $\eta^2_p$  |
| Mean $f_0$                                 | 3421   | 3421    | 1     | 313   | 18.514  | <b>&lt; .001</b> | <b>0.06</b> |
| F2                                         | 327    | 327     | 1     | 486   | 1.769   | .184             | 0.00        |
| Duration                                   | 536    | 536     | 1     | 188   | 2.901   | .090             | 0.02        |
| CPPs                                       | 185    | 185     | 1     | 12    | 1.000   | .338             | 0.08        |
| Age                                        | 307    | 307     | 1     | 4     | 1.663   | .271             | 0.31        |
| Height                                     | 1951   | 1951    | 1     | 4     | 10.558  | <b>.036</b>      | <b>0.74</b> |

Abbreviations: Sq = squared; NumDF = numerator, degrees of freedom; DenDF = denominator, degrees of freedom; Duration =  $h$  + vowel duration.

**Table S2.16.** Summary output of linear mixed-effects model for speaker and token effects on ratings of trans feminine speakers in phonated speech.

| Very Female/Very Male               |                      |           |           |                 |                 |
|-------------------------------------|----------------------|-----------|-----------|-----------------|-----------------|
| Fixed Effects                       | Estimate             | <i>SE</i> | <i>DF</i> | <i>t</i> -value | <i>p</i> -value |
| Intercept                           | 79.081               | 2.005     | 20.993    | 39.435          | < .001          |
| Mean <i>f</i> <sub>0</sub>          | −1.621               | 0.619     | 362.746   | −2.618          | .009            |
| F2                                  | −0.474               | 0.725     | 375.191   | −0.653          | .514            |
| Duration                            | −1.054               | 0.858     | 106.975   | −1.228          | .222            |
| CPPs                                | −0.002               | 0.849     | 14.652    | −0.002          | .999            |
| Age                                 | −2.262               | 1.065     | 10.257    | −2.125          | .059            |
| Height                              | 4.121                | 1.027     | 10.726    | 4.014           | .002            |
| Random Effects                      | Type                 | Variance  | <i>SD</i> |                 |                 |
|                                     | Listener (Intercept) | 69.838    | 8.357     |                 |                 |
|                                     | Speaker (Intercept)  | 1.709     | 1.311     |                 |                 |
| Feminine/Masculine                  |                      |           |           |                 |                 |
| Fixed Effects                       | Estimate             | <i>SE</i> | <i>DF</i> | <i>t</i> -value | <i>p</i> -value |
| Intercept                           | 74.599               | 1.831     | 23.770    | 40.733          | < .001          |
| Mean <i>f</i> <sub>0</sub>          | −2.250               | 0.529     | 414.759   | −4.255          | < .001          |
| F2                                  | −1.130               | 0.616     | 518.021   | −1.834          | .067            |
| Duration                            | −1.767               | 0.757     | 226.924   | −2.335          | .020            |
| CPPs                                | −0.211               | 0.861     | 20.659    | −0.245          | .809            |
| Age                                 | −0.937               | 1.154     | 9.157     | −0.811          | .438            |
| Height                              | 3.903                | 1.109     | 9.145     | 3.519           | .006            |
| Random Effects                      | Type                 | Variance  | <i>SD</i> |                 |                 |
|                                     | Listener (Intercept) | 55.807    | 7.470     |                 |                 |
|                                     | Speaker (Intercept)  | 3.835     | 1.958     |                 |                 |
| Feminine Female/Masculine Male      |                      |           |           |                 |                 |
| Fixed Effects                       | Estimate             | <i>SE</i> | <i>DF</i> | <i>t</i> -value | <i>p</i> -value |
| Intercept                           | 78.965               | 1.392     | 9.661     | 56.726          | < .001          |
| Mean <i>f</i> <sub>0</sub>          | −2.938               | 0.521     | 495.176   | −5.644          | < .001          |
| F2                                  | −1.296               | 0.599     | 633.882   | −2.164          | .031            |
| Duration                            | −0.933               | 0.755     | 439.815   | −1.236          | .217            |
| CPPs                                | 0.747                | 0.991     | 36.513    | 0.754           | .456            |
| Age                                 | −1.762               | 1.549     | 7.128     | −1.138          | .292            |
| Height                              | 5.533                | 1.498     | 6.670     | 3.694           | .008            |
| Random Effects                      | Type                 | Variance  | <i>SD</i> |                 |                 |
|                                     | Listener (Intercept) | 11.84     | 3.441     |                 |                 |
|                                     | Speaker (Intercept)  | 9.60      | 3.098     |                 |                 |
| Very Feminine/Not at all Feminine   |                      |           |           |                 |                 |
| Fixed Effects                       | Estimate             | <i>SE</i> | <i>DF</i> | <i>t</i> -value | <i>p</i> -value |
| Intercept                           | 80.044               | 2.032     | 26.605    | 39.399          | < .001          |
| Mean <i>f</i> <sub>0</sub>          | −1.823               | 0.454     | 748.909   | −4.013          | < .001          |
| F2                                  | −2.145               | 0.520     | 1056.877  | −4.129          | < .001          |
| Duration                            | −2.201               | 0.659     | 737.855   | −3.340          | .001            |
| CPPs                                | 0.881                | 0.910     | 53.690    | 0.969           | .337            |
| Age                                 | −1.792               | 1.559     | 6.590     | −1.149          | .291            |
| Height                              | 4.791                | 1.517     | 6.098     | 3.159           | .019            |
| Random Effects                      | Type                 | Variance  | <i>SD</i> |                 |                 |
|                                     | Listener (Intercept) | 98.000    | 9.899     |                 |                 |
|                                     | Speaker (Intercept)  | 10.640    | 3.262     |                 |                 |
| Not at all Masculine/Very Masculine |                      |           |           |                 |                 |
| Fixed Effects                       | Estimate             | <i>SE</i> | <i>DF</i> | <i>t</i> -value | <i>p</i> -value |
| Intercept                           | 74.605               | 2.243     | 16.928    | 33.258          | < .001          |
| Mean <i>f</i> <sub>0</sub>          | −2.712               | 0.630     | 312.931   | −4.303          | < .001          |
| F2                                  | −0.972               | 0.731     | 486.089   | −1.330          | .184            |

|                |                      |          |         |        |             |
|----------------|----------------------|----------|---------|--------|-------------|
| Duration       | -1.548               | 0.909    | 188.466 | -1.703 | .090        |
| CPPs           | 1.104                | 1.105    | 11.690  | 1.000  | .338        |
| Age            | -2.017               | 1.564    | 3.757   | -1.289 | .271        |
| Height         | 4.889                | 1.505    | 3.632   | 3.249  | <b>.036</b> |
| Random Effects | Type                 | Variance | SD      |        |             |
|                | Listener (Intercept) | 73.766   | 8.589   |        |             |
|                | Speaker (Intercept)  | 8.343    | 2.883   |        |             |

Abbreviations: *SE* = standard error; *DF* = degrees of freedom; Duration = *h* + vowel duration.

**Table S2.17.** ANOVA table for linear mixed-effects model (with Satterthwaite approximation for degrees of freedom) for speaker and token effects on ratings of transfeminine speakers in whispered speech.

| <b>Very Female/Very Male</b>               |        |         |       |       |         |                  |             |
|--------------------------------------------|--------|---------|-------|-------|---------|------------------|-------------|
| Variable                                   | Sum Sq | Mean Sq | NumDF | DenDF | F-value | p-value          | $\eta^2_p$  |
| F2                                         | 1734   | 1734    | 1     | 615   | 4.127   | <b>.043</b>      | <b>0.00</b> |
| Duration                                   | 1701   | 1701    | 1     | 341   | 4.048   | <b>.045</b>      | <b>0.01</b> |
| Age                                        | 976    | 976     | 1     | 8     | 2.323   | .168             | 0.24        |
| Height                                     | 3709   | 3709    | 1     | 8     | 8.830   | <b>.019</b>      | <b>0.54</b> |
| <b>Feminine/Masculine</b>                  |        |         |       |       |         |                  |             |
| Variable                                   | Sum Sq | Mean Sq | NumDF | DenDF | F-value | p-value          | $\eta^2_p$  |
| F2                                         | 1333   | 1333    | 1     | 652   | 4.421   | <b>.036</b>      | <b>0.00</b> |
| Duration                                   | 2607   | 2607    | 1     | 578   | 8.650   | <b>.003</b>      | <b>0.01</b> |
| Age                                        | 641    | 641     | 1     | 8     | 2.125   | .184             | 0.22        |
| Height                                     | 2160   | 2160    | 1     | 8     | 7.166   | <b>.029</b>      | <b>0.48</b> |
| <b>Feminine Female/Masculine Male</b>      |        |         |       |       |         |                  |             |
| Variable                                   | Sum Sq | Mean Sq | NumDF | DenDF | F-value | p-value          | $\eta^2_p$  |
| F2                                         | 1373   | 1373    | 1     | 680   | 3.212   | .074             | 0.00        |
| Duration                                   | 1557   | 1557    | 1     | 592   | 3.641   | .057             | 0.00        |
| Age                                        | 1470   | 1470    | 1     | 8     | 3.439   | .101             | 0.30        |
| Height                                     | 4752   | 4752    | 1     | 8     | 11.114  | <b>.011</b>      | <b>0.59</b> |
| <b>Very Feminine/Not at all Feminine</b>   |        |         |       |       |         |                  |             |
| Variable                                   | Sum Sq | Mean Sq | NumDF | DenDF | F-value | p-value          | $\eta^2_p$  |
| F2                                         | 7363   | 7363    | 1     | 1145  | 17.199  | <b>&lt; .001</b> | <b>0.01</b> |
| Duration                                   | 1831   | 1831    | 1     | 879   | 4.276   | <b>.039</b>      | <b>0.00</b> |
| Age                                        | 1262   | 1262    | 1     | 8     | 2.947   | .125             | 0.27        |
| Height                                     | 4394   | 4394    | 1     | 8     | 10.263  | <b>.013</b>      | <b>0.56</b> |
| <b>Not at all Masculine/Very Masculine</b> |        |         |       |       |         |                  |             |
| Variable                                   | Sum Sq | Mean Sq | NumDF | DenDF | F-value | p-value          | $\eta^2_p$  |
| F2                                         | 2865   | 2865    | 1     | 620   | 8.116   | <b>.005</b>      | <b>0.01</b> |
| Duration                                   | 4689   | 4689    | 1     | 571   | 13.285  | <b>&lt; .001</b> | <b>0.02</b> |
| Age                                        | 698    | 698     | 1     | 8     | 1.979   | .198             | 0.20        |
| Height                                     | 2987   | 2987    | 1     | 8     | 8.463   | <b>.020</b>      | <b>0.52</b> |

Abbreviations: Sq = squared; NumDF = numerator, degrees of freedom; DenDF = denominator, degrees of freedom; Duration = *h* + vowel duration.

**Table S2.18.** Summary output of linear mixed-effects model for speaker and token effects on ratings of transfeminine speakers in whispered speech.

| <b>Very Female/Very Male</b> |          |       |         |         |                  |
|------------------------------|----------|-------|---------|---------|------------------|
| Fixed Effects                | Estimate | SE    | DF      | t-value | p-value          |
| Intercept                    | 64.846   | 3.906 | 17.444  | 16.603  | <b>&lt; .001</b> |
| F2                           | -1.980   | 0.975 | 615.097 | -2.031  | <b>.043</b>      |
| Duration                     | -2.832   | 1.408 | 341.025 | -2.012  | <b>.045</b>      |
| Age                          | -5.369   | 3.522 | 7.528   | -1.524  | .168             |
| Height                       | 10.472   | 3.524 | 7.554   | 2.971   | <b>.019</b>      |

|                                            |                      |          |          |         |         |
|--------------------------------------------|----------------------|----------|----------|---------|---------|
| Random Effects                             | Type                 | Variance | SD       |         |         |
|                                            | Listener (Intercept) | 127.400  | 11.288   |         |         |
|                                            | Speaker (Intercept)  | 65.800   | 8.112    |         |         |
| <b>Feminine/Masculine</b>                  |                      |          |          |         |         |
| Fixed Effects                              | Estimate             | SE       | DF       | t-value | p-value |
| Intercept                                  | 58.741               | 4.142    | 10.959   | 14.184  | < .001  |
| F2                                         | -1.703               | 0.810    | 651.800  | -2.103  | .036    |
| Duration                                   | -3.535               | 1.202    | 578.391  | -2.941  | .003    |
| Age                                        | -6.478               | 4.444    | 7.749    | -1.458  | .184    |
| Height                                     | 11.900               | 4.445    | 7.761    | 2.677   | .029    |
| Random Effects                             | Type                 | Variance | SD       |         |         |
|                                            | Listener (Intercept) | 61.900   | 7.867    |         |         |
|                                            | Speaker (Intercept)  | 110.000  | 10.490   |         |         |
| <b>Feminine Female/Masculine Male</b>      |                      |          |          |         |         |
| Fixed Effects                              | Estimate             | SE       | DF       | t-value | p-value |
| Intercept                                  | 67.403               | 4.484    | 9.247    | 15.031  | < .001  |
| F2                                         | -1.694               | 0.945    | 680.138  | -1.792  | .074    |
| Duration                                   | -2.666               | 1.397    | 591.901  | -1.908  | .057    |
| Age                                        | -9.384               | 5.060    | 7.864    | -1.854  | .101    |
| Height                                     | 16.891               | 5.067    | 7.876    | 3.334   | .011    |
| Random Effects                             | Type                 | Variance | SD       |         |         |
|                                            | Listener (Intercept) | 36.950   | 6.079    |         |         |
|                                            | Speaker (Intercept)  | 142.550  | 11.393   |         |         |
| <b>Very Feminine/Not at all Feminine</b>   |                      |          |          |         |         |
| Fixed Effects                              | Estimate             | SE       | DF       | t-value | p-value |
| Intercept                                  | 65.058               | 3.635    | 10.939   | 17.897  | < .001  |
| F2                                         | -3.015               | 0.727    | 1145.356 | -4.147  | < .001  |
| Duration                                   | -2.229               | 1.078    | 878.995  | -2.068  | .039    |
| Age                                        | -6.736               | 3.924    | 7.835    | -1.717  | .125    |
| Height                                     | 12.576               | 3.925    | 7.848    | 3.204   | .013    |
| Random Effects                             | Type                 | Variance | SD       |         |         |
|                                            | Listener (Intercept) | 78.870   | 8.881    |         |         |
|                                            | Speaker (Intercept)  | 85.770   | 9.261    |         |         |
| <b>Not at all Masculine/Very Masculine</b> |                      |          |          |         |         |
| Fixed Effects                              | Estimate             | SE       | DF       | t-value | p-value |
| Intercept                                  | 63.114               | 4.511    | 8.390    | 13.993  | < .001  |
| F2                                         | -2.561               | 0.899    | 620.416  | -2.849  | .005    |
| Duration                                   | -4.870               | 1.336    | 571.134  | -3.645  | < .001  |
| Age                                        | -7.326               | 5.208    | 7.777    | -1.407  | .198    |
| Height                                     | 15.156               | 5.210    | 7.788    | 2.909   | .020    |
| Random Effects                             | Type                 | Variance | SD       |         |         |
|                                            | Listener (Intercept) | 16.560   | 4.069    |         |         |
|                                            | Speaker (Intercept)  | 151.72   | 12.318   |         |         |

Abbreviations: SE = standard error; DF = degrees of freedom; Duration = *h* + vowel duration.
