# Supplementary material
Source: publisher figshare collection journal article supplement (https://asha.figshare.com/articles/dataset/_/19617564)
Supplement: Supplementary file 2 [file 1]

**Supplemental Material S1.** Gender and femininity/masculinity rating scales types by study.

| Study                                                        | Scale                               | Terminology                                                                                               |
|--------------------------------------------------------------|-------------------------------------|-----------------------------------------------------------------------------------------------------------|
| Coleman (1971) <sup>a</sup>                                  | 2 AFC                               | female/male                                                                                               |
| Coleman (1976)                                               | 2 AFC<br>7-point EAI                | female/male<br>least amount of [femaleness/maleness] to most amount of [femaleness/maleness] <sup>b</sup> |
| Lass, Hughes, Bowyer, Waters, and Bourne (1976) <sup>a</sup> | 2 AFC                               | female/male                                                                                               |
| Spencer (1988)                                               | 2 AFC<br>7-point EAI                | female/male<br>least amount of [femaleness/maleness] to most amount of [femaleness/maleness] <sup>b</sup> |
| Wolfe, Ratusnik, and Smith (1990)                            | 2 AFC<br>7-point EAI                | female/male<br>extremely feminine-sounding speech and voice to extremely masculine-sounding speech        |
| Gelfer and Schofield (2000)                                  | 2 AFC<br>7-point EAI                | female/male<br>very feminine to very masculine                                                            |
| Van Borsel, De Cuypere, and Van den Berghe (2001)            | 10-point EAI                        | not at all female to very female                                                                          |
| Gelfer and Mikos (2005)                                      | 2 AFC                               | female/male                                                                                               |
| Gorham-Rowan and Morris (2006)                               | VAS                                 | masculine to feminine                                                                                     |
| Carew, Dacakis, and Oates (2007)                             | VAS                                 | very masculine to very feminine                                                                           |
| McNeill, Wilson, Clark, and Deakin (2008)                    | VAS                                 | very masculine to very feminine                                                                           |
| Hillenbrand and Clark (2009) <sup>a</sup>                    | 2 AFC                               | man/woman                                                                                                 |
| Holmberg, Oates, Dacakis, and Grant (2010) <sup>a</sup>      | VAS                                 | very male to very female                                                                                  |
| Hancock, Krissinger, and Owen (2011) <sup>a</sup>            | VAS                                 | masculine to feminine                                                                                     |
| King, Brown, and McCrea (2012)                               | 2 AFC<br>7-point EAI                | female/male<br>ultra masculine speech/voice to ultra feminine speech/voice                                |
| Palmer, Dietsch, and Searl (2012)                            | 2 AFC                               | female/male                                                                                               |
| Gelfer and Van Dong (2013) <sup>a</sup>                      | 2 AFC<br>7-point EAI<br>7-point EAI | female/male<br>very feminine to not at all feminine<br>very masculine to not at all masculine             |

|                                                      |                                       |                                                                                               |
|------------------------------------------------------|---------------------------------------|-----------------------------------------------------------------------------------------------|
| Gelfer and Tice (2013) <sup>a</sup>                  | 2 AFC<br>7-point EAI<br>7-point EAI   | female/male<br>very feminine to not at all feminine<br>very masculine to not at all masculine |
| Junger et al. (2013)                                 | 2 AFC                                 | female/male                                                                                   |
| Hancock, Colton, and Douglas (2014)                  | VAS                                   | masculine male to feminine male to masculine female to feminine female                        |
| Skuk and Schweinberger (2014)                        | 2 AFC                                 | female/male                                                                                   |
| Donai and Lass (2015)                                | 2 AFC                                 | 2 AFC - female/male                                                                           |
| Hardy et al. (2016) <sup>a</sup>                     | 2AFC<br>VAS                           | 2 AFC - female/male<br>very masculine to very feminine                                        |
| Donai and Halbritter (2017)                          | 2 AFC                                 | female/male                                                                                   |
| Hancock and Pool (2017)                              | 2 AFC<br>VAS                          | female/male<br>very masculine to very feminine                                                |
| Schwarz et al. (2018) <sup>a</sup>                   | VAS                                   | more masculine to more feminine                                                               |
| Gallena, Stickels, and Stickels (2018)               | 3 AFC                                 | female/male/gender ambiguous                                                                  |
| Houle and Levi (2021)                                | VAS                                   | feminine to masculine                                                                         |
| Dahl and Mahler (2020)                               | 5-point EAI                           | very male to very female                                                                      |
| Kawitzky and McAllister (2020)                       | VAS                                   | definitely male to definitely female                                                          |
| Brown, Dahl, Cler, and Stepp (2020)                  | VAS                                   | definitely male to guessing male to guessing female to definitely female                      |
| Hardy, Boliek, et al. (2020)                         | DME without<br>modulus<br>3 AFC       | feminine<br>woman/man/ambiguous                                                               |
| Hardy, Rieger, Wells, and Boliek (2020) <sup>a</sup> | DME without<br>modulus<br>2 AFC       | feminine<br>female/male                                                                       |
| Merritt and Bent (2020) <sup>a</sup>                 | 9-point EAI<br>DME without<br>modulus | very masculine to very feminine<br>feminine                                                   |

*Abbreviations: AFC, alternative forced choice task; EAI, equal appearing interval; VAS, visual analog scale; DME, direct magnitude estimation.*

<sup>a</sup> Study included additional auditory-perceptual rating scales not discussed here.

<sup>b</sup> Femininity was rated when the speaker was identified as female, and masculinity was rated when the speaker was identified as male.

## References

- Brown, K. M., Dahl, K. L., Cler, G. J., & Stepp, C. E. (2020). Listener age and gender diversity: Effects on voice-based perception of gender. *Journal of Voice*, 35(5), 739–745. <https://doi.org/10.1016/j.jvoice.2020.02.004>
- Carew, L., Dacakis, G., & Oates, J. M. (2007). The effectiveness of oral resonance therapy on the perception of femininity of voice in male-to-female transsexuals. *Journal of Voice*, 21(5), 591–603. <https://doi.org/10.1016/j.jvoice.2006.05.005>
- Coleman, R. O. (1971). Male and female voice quality and its relationship to vowel formant frequencies. *Journal of Speech and Hearing Research*, 14(3), 565–577. <https://doi.org/10.1044/jshr.1403.565>
- Coleman, R. O. (1976). A comparison of the contributions of two voice quality characteristics to the perception of maleness and femaleness in the voice. *Journal of Speech and Hearing Research*, 19(1), 168–180. <https://doi.org/10.1044/jshr.1901.168>
- Dahl, K. L., & Mahler, L. A. (2020). Acoustic features of transfeminine voices and perceptions of voice femininity. *Journal of Voice*, 34(6), 961.e19. <https://doi.org/10.1016/j.jvoice.2019.05.012>
- Donai, J. J., & Halbritter, R. M. (2017). Gender identification using high-frequency speech energy: Effects of increasing the low-frequency limit. *Ear and Hearing*, 38(1), 65–73. <https://doi.org/10.1097/AUD.0000000000000353>
- Donai, J. J., & Lass, N. J. (2015). Gender identification from high-pass filtered vowel segments: The use of high-frequency energy. *Attention, Perception, and Psychophysics*, 77(7), 2452–2462. <https://doi.org/10.3758/s13414-015-0945-y>
- Gallena, S. J. K., Stickels, B., & Stickels, E. (2018). Gender perception after raising vowel fundamental and formant frequencies: Considerations for oral resonance research. *Journal of Voice*, 32(5), 592–601. <https://doi.org/10.1016/j.jvoice.2017.06.023>
- Gelfer, M. P., & Mikos, V. A. (2005). The relative contributions of speaking fundamental frequency and formant frequencies to gender identification based on isolated vowels. *Journal of Voice*, 19(4), 544–554. <https://doi.org/10.1016/j.jvoice.2004.10.006>
- Gelfer, M. P., & Schofield, K. J. (2000). Comparison of acoustic and perceptual measures of voice in male-to-female transsexuals perceived as female versus those perceived as male. *Journal of Voice*, 14(1), 22–33. [https://doi.org/10.1016/S0892-1997\(00\)80092-2](https://doi.org/10.1016/S0892-1997(00)80092-2)
- Gelfer, M. P., & Tice, R. M. (2013). Perceptual and acoustic outcomes of voice therapy for male-to-female transgender individuals immediately after therapy and 15 months later. *Journal of Voice*, 27(3), 335–347. <https://doi.org/10.1016/j.jvoice.2012.07.009>
- Gelfer, M. P., & Van Dong, B. R. (2013). A preliminary study on the use of vocal function exercises to improve voice in male-to-female transgender clients. *Journal of Voice*, 27(3), 321–334. <https://doi.org/10.1016/j.jvoice.2012.07.008>
- Gorham-Rowan, M., & Morris, R. (2006). Aerodynamic analysis of male-to-female transgender voice. *Journal of Voice*, 20(2), 251–262. <https://doi.org/10.1016/j.jvoice.2005.03.004>
- Hancock, A., Colton, L., & Douglas, F. (2014). Intonation and gender perception: Applications for transgender speakers. *Journal of Voice*, 28(2), 203–209. <https://doi.org/10.1016/j.jvoice.2013.08.009>
- Hancock, A., Krissinger, J., & Owen, K. (2011). Voice perceptions and quality of life of transgender people. *Journal of Voice*, 25(5), 553–558. <https://doi.org/10.1016/j.jvoice.2010.07.013>
- Hancock, A., & Pool, S. F. (2017). Influence of listener characteristics on perceptions of sex and gender. *Journal of Language and Social Psychology*, 36(5), 599–610. <https://doi.org/10.1177/0261927X17704460>
- Hardy, T. L. D., Boliek, C. A., Aalto, D., Lewicke, J., Wells, K., & Rieger Jana, M. (2020). Contributions of voice and nonverbal communication to perceived masculinity–femininity for cisgender and transgender communicators. *Journal of Speech, Language, and Hearing Research*, 63(4), 931–947. [https://doi.org/10.1044/2019\\_JSLHR-19-00387](https://doi.org/10.1044/2019_JSLHR-19-00387)

- Hardy, T. L. D., Boliek, C. A., Wells, K., Dearden, C., Zalmanowitz, C., & Rieger, J. M. (2016). Pretreatment acoustic predictors of gender, femininity, and naturalness ratings in individuals with male-to-female gender identity. *American Journal of Speech-Language Pathology*, 25(2), 125–137. [https://doi.org/10.1044/2015\\_AJSLP-14-0098](https://doi.org/10.1044/2015_AJSLP-14-0098)
- Hardy, T. L. D., Rieger, J. M., Wells, K., & Boliek, C. A. (2020). Acoustic predictors of gender attribution, masculinity–femininity, and vocal naturalness ratings amongst transgender and cisgender speakers. *Journal of Voice*, 34(2), 300.e11–300.e326. <https://doi.org/10.1016/j.jvoice.2018.10.002>
- Hillenbrand, J. M., & Clark, M. J. (2009). The role of f0 and formant frequencies in distinguishing the voices of men and women. *Attention, Perception, & Psychophysics*, 71(5), 1150–1166. <https://doi.org/10.3758/APP.71.5.1150>
- Holmberg, E. B., Oates, J. M., Dacakis, G., & Grant, C. (2010). Phonetograms, aerodynamic measurements, self-evaluations, and auditory perceptual ratings of male-to-female transsexual voice. *Journal of Voice*, 24(5), 511–522. <https://doi.org/10.1016/j.jvoice.2009.02.002>
- Houle, N., & Levi, S. V. (2021). Effect of phonation on perception of femininity/masculinity in transgender and cisgender speakers. *Journal of Voice*, 35(3), 497.e23–497.e37. <https://doi.org/10.1016/j.jvoice.2019.10.011>
- Junger, J., Pauly, K., Bröhr, S., Birkholz, P., Neuschaefer-Rube, C., Kohler, C., Schneider, F., Derntl, B., & Habel, U. (2013). Sex matters: Neural correlates of voice gender perception. *Neuro-Image*, 79, 275–287. <https://doi.org/10.1016/j.neuroimage.2013.04.105>
- Kawitzky, D., & McAllister, T. (2020). The effect of formant biofeedback on the feminization of voice in transgender women. *Journal of Voice*, 34(1), 53–67. <https://doi.org/10.1016/j.jvoice.2018.07.017>
- King, R. S., Brown, G. R., & McCrea, C. R. (2012). Voice parameters that result in identification or misidentification of biological gender in male-to-female transgender veterans. *International Journal of Transgenderism*, 13(3), 117–130. <https://doi.org/10.1080/15532739.2011.664464>
- Lass, N. J., Hughes, K. R., Bowyer, M. D., Waters, L. T., & Bourne, V. T. (1976). Speaker sex identification from voiced, whispered, and filtered isolated vowels. *The Journal of the Acoustical Society of America*, 59(3), 675–678. <https://doi.org/10.1121/1.380917>
- McNeill, E. J. M., Wilson, J. A., Clark, S., & Deakin, J. (2008). Perception of voice in the transgender client. *Journal of Voice*, 22(6), 727–733. <https://doi.org/10.1016/j.jvoice.2006.12.010>
- Merritt, B., & Bent, T. (2020). Perceptual evaluation of speech naturalness in speakers of varying gender identities. *Journal of Speech, Language, and Hearing Research*, 63(7), 2054–2069. [https://doi.org/10.1044/2020\\_JSLHR-19-00337](https://doi.org/10.1044/2020_JSLHR-19-00337)
- Palmer, D., Dietsch, A., & Searl, J. (2012). Endoscopic and stroboscopic presentation of the larynx in male-to-female transsexual persons. *Journal of Voice*, 26(1), 117–126. <https://doi.org/10.1016/j.jvoice.2010.10.014>
- Schwarz, K., Fontanari, A. M. V., Costa, A. B., Soll, B. M. B., da Silva, D. C., de Sá Villas-Bôas, A. P., Cielo C. A., Bastilha, G. R., Ribeiro, V. V., Dorfman, M. E. K. Y., & Lobato, M. I. R. (2018). Perceptual-auditory and acoustical analysis of the voices of transgender women. *Journal of Voice*, 32(5), 602–608. <https://doi.org/10.1016/j.jvoice.2017.07.003>
- Skuk, V. G., & Schweinberger, S. R. (2014). Influences of fundamental frequency, formant frequencies, aperiodicity, and spectrum level on the perception of voice gender. *Journal of Speech, Language, and Hearing Research*, 57(1), 285–296. [https://doi.org/10.1092-4388\(2013/12-0314\)](https://doi.org/10.1092-4388(2013/12-0314))
- Spencer, L. E. (1988). Speech characteristics of male-to-female transsexuals: A perceptual and acoustic study. *Folia Phoniatrica et Logopaedica*, 40(1), 31–42. <https://doi.org/10.1159/000265881>
- Van Borsel, J., De Cuypere, G., & Van den Berghe, H. (2001). Physical appearance and voice in male-to-female transsexuals. *Journal of Voice*, 15(4), 570–575. [https://doi.org/10.1016/S0892-1997\(01\)00059-5](https://doi.org/10.1016/S0892-1997(01)00059-5)

Wolfe, V. I., Ratusnik, D. L., & Smith, F. H. (1990). Intonation and fundamental frequency in male-to-female transsexuals. *Journal of Speech and Hearing Disorders*, 55(1), 43–50. <https://doi.org/10.1044/jshd.5501.43>
